# Supplementary material for: Two-color sum frequency generation study of poly(9,9-dioctylfluorene)/electrode interfaces
Source: Royal Society of Chemistry journal article supplement (doi:10.1039/c0cp00838a), 2010-01-01
Supplement: c0cp00838a.pdf [file c0cp00838a.pdf]

## Electronic Supplementary Information for

# Two-color Sum Frequency Generation Study of poly(9,9-dioctylfluorene)/Electrode Interfaces

Takayuki Miyamae,\* Kiyomi Tsukagoshi and Wataru Mizutani

## 1. Experimental Section

### 1.1 Sample preparation

The samples of the PFO endcapped with dimethylphenyl (MW=48.8K) were obtained from American Dye Source and used as received. At first, thin film of the filtered PEDOT:PSS solution (CREVIOS A14083) was spin-coated at 3000 rpm on the top of the fused quartz or 2 mm thick CaF<sub>2</sub> (Pier Optics Co.) substrates and then baked at 150 °C for 60 min in an oven with N<sub>2</sub> flow. PFO layer was then spin-coated at 3000 rpm from 1% w/v toluene solution through a 0.4µm filter on top of the PEDOT:PSS layer. Then the films were evacuated to eliminate residual solvent.

For the measurements of the buried electrode/PFO interface, the LiF and the Al were directly deposited on the spin-coated PFO/PEDOT:PSS onto 2 mm thick CaF<sub>2</sub> substrates in a vacuum chamber with base pressure of  $1 \times 10^{-7}$  Pa. A pumping system was composed of a 2000 l/s turbomolecular pump and a 500 l/min rotary pump for a vacuum deposition chamber and a 50 l/s turbomolecular pump and a 90 l/min rotary pump for a load-lock chamber. The thicknesses of the LiF and Al are about 1 and 40 nm, respectively. The thicknesses of Al and LiF films were monitored using a quartz microbalance. The deposition rate of the sample materials, were about 0.5-1.5 nm/s for Al and 0.01nm/s for LiF, respectively.

### 1.2 Two-color SFG measurements

The basic SFG system employed in this experiment has been described in detail in the previous publication,<sup>1</sup> and we modified this system for the two-color experiment.<sup>2</sup> In brief, a mode-locked Nd:YAG laser (Ekspla, PL-2143D, 25ps pulsewidth, 10Hz) with two optical parametric systems (Ekspla, DFG401) was used to generate a tunable visible beam from 420 to 640 nm and a tunable IR beam from 2.5 to 10 µm. The visible and IR beams were overlapped at sample surface with the incidence angles of 70° and 50°, respectively. The spectral resolution of the IR beam was 6 cm<sup>-1</sup>, and the IR frequency was calibrated with the absorption lines of polystyrene standard. In order to minimize the irradiation damage, both IR and visible beams were defocused. The focus size of the IR and visible beams were >1 mm and >3 mm, respectively. Further, in order to avoid

photo-irradiated damage, the fluence of the visible beam was kept below 50  $\mu\text{J}$  and 10  $\mu\text{J}$  per pulse for the PFO surface and the electrode/PFO interface, respectively. The sum-frequency output signal was filtered with short-wave-pass filters, monochromator (Oriel MS257), and then detected by a photomultiplier tube. The signal was then averaged over 300 pulses by a gated integrator for every data point taken at a 5  $\text{cm}^{-1}$  interval and was stored in a personal computer. All SFG intensities were normalized using a z-cut quartz crystal. In the frequency region between 2000 and 1300  $\text{cm}^{-1}$ , significant portion of the infrared beam is absorbed by water vapour in the optical path. The effect was minimized by purging the optical path of the IR beam and the sample stage by dry nitrogen gas.

## 2. Theory of the doubly-resonant SFG

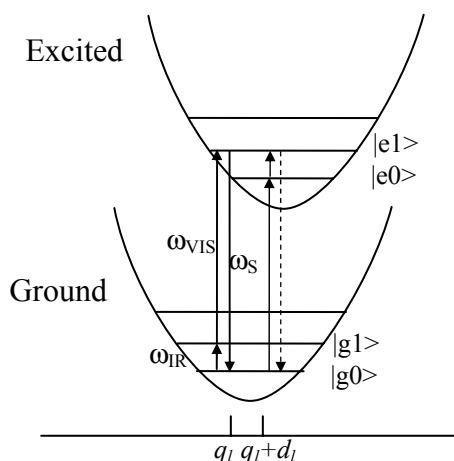

Fig. S1. Energy diagram for doubly-resonant SFG. The vibration harmonic potentials are shifted between the ground and excited states. The resonant transitions involved in the doubly resonant IR–visible (and visible–IR) sum-frequency generation processes are shown schematically.

In the infrared–visible (and visible–infrared) doubly–resonant (DR) SFG process shown schematically in Fig. S1, the microscopic expression for  $\chi^{(2)}$  is dominated by doubly resonant terms. In the dipolar electric approximation, SFG is forbidden in centrosymmetric materials, but not at their interfaces, where the inversion symmetry of the bulk is broken. For such an air–metal interface, the SFG intensity reflected from the surface is given by

$$I(\omega_{\text{SF}}) \propto \left| \chi_{\text{eff}}^{(2)} : E(\omega_{\text{IR}})E(\omega_{\text{VIS}}) \right|^2 \quad (\text{S1})$$

$\chi_{\text{eff}}^{(2)}$  is the effective second-order nonlinear susceptibility tensor and  $E(\omega_{\text{IR}})$  and  $E(\omega_{\text{VIS}})$  are the input fields.

The adsorbate nonlinear susceptibility contains nonresonant, singly resonant, and doubly resonant contributions. The latter dominates strongly if the vibrations ( $\omega_i$ ) and electronic transitions

( $\omega_{eg}$ ) probed by  $\omega_{IR}$  and  $\omega_{SFG}$  are coupled. Both IR–visible and visible–IR processes contribute to doubly–resonant SFG. However, the IR–visible sequence is expected to dominate, as a result of the quicker relaxation of the electronic excitation compared to the vibrational one. Assuming harmonic potential surfaces for the electronic states and the Born–Oppenheimer and Condon approximations, the IR–visible doubly–resonant  $\chi_{eff}^{(2)}$  can be described as<sup>3,4</sup>.

$$\chi_{ijk}^{(2)} = -\frac{N}{\hbar^2} \left\langle \mu_{eg}^i \mu_{eg}^j \frac{\partial \mu_{gg}^k}{\partial q_l} \frac{\sqrt{S_l} e^{-S_l}}{\omega_{IR} - \omega_l + i\Gamma_l} \right. \\ \left. \times \sum_{n=0}^{\infty} \frac{S_l^n}{n!} \left\{ \frac{1}{\omega_s - n\omega_l - \omega_{eg} + i\Gamma_{en,g0}} - \frac{1}{\omega_s - (n+1)\omega_l - \omega_{eg} + i\Gamma_{en+1,g0}} \right\} \right\rangle + \chi_{NR,ijk}^{(2)} \quad (S2)$$

where  $N$  is the surface molecular density,  $\mu_{eg}^i$  represents the  $i$  component of electronic transition moment,  $q_l$  is the normal coordinate,  $S_l$  is a dimensionless coupling constant known as the Huang-Rhys factor,  $n$  labels the vibrational state,  $g$  and  $e$  label the ground and excited electronic states, respectively,  $\omega_{SFG}$  is the SFG frequency,  $\omega_l$  and  $\omega_{eg}$  are the resonant vibrational and electronic frequencies, respectively,  $\Gamma_l$  and  $\Gamma_{en,g0}$  are the damping constants, the angular brackets indicate an average over molecular orientations, and  $\chi_{NR,ijk}^{(2)}$  describes the non-resonant contributions.  $S_l$  is related to the shift  $d_l$  of the harmonic potential of the vibration in the excited electronic level by

$$S_l = \frac{1}{2\hbar} \omega_l d_l^2. \quad (S3)$$

As shown in Fig. S1, DR-SFG occurs thus for  $\omega_{IR} = \omega_l$  and for several visible frequencies, when,  $\omega_{SFG}$  matches an allowed vibronic transition to the excited electronic level. The intensity of each vibronic resonance depends on the Frank-Condon overlap integrals of the vibrational levels involved in the transition. Since the initial and final vibrational states, respectively of the visible and SFG transitions, always differ (see Fig. S1), the vibration and the electronic transition must therefore be coupled ( $d_l \neq 0$ ) to have a non-zero transition probability for the global DR-SFG process. Thus the DR-SFG spectrum allows for the determination of the coupling strength and characteristics.

Equation S2 includes all the vibronic transitions series. However, in general, the VIS-IR SFG is much weaker and not detected because of the very fast relaxation of the electronic excitation. Actually, the dephasing times of vibronic transitions are in the femtosecond region for PFO.<sup>5</sup> Therefore, by assuming  $\Gamma_{en,g0} \gg \Gamma_{e0,g0}$ , the nonzero vibronic transitions can be neglected.

It is worth pointing out that a significantly larger  $\Gamma_{en,g0}$  also suppresses the aforementioned VIS-IR SFG, which starts with an electronic transition followed by a vibrational transition.

To analyze the spectra, we note that with the visible input frequency  $\omega_{vis}$  fixed, Eq. (S3) can be approximated by the form

$$\chi_{ijk}^{(2)} \propto \sum_l \frac{A_l}{\omega_{IR} - \omega_l + i\Gamma_l} + \chi_{NR}^{(2)} e^{i\xi}, \quad (S4)$$

with  $A_l$  describing the electronic resonance. We use Eq. S4 to fit all the measured spectra with  $\omega_l$ ,  $\Gamma_l$ ,  $A_l\xi$ , and  $\chi_{NR}^{(2)}$  as adjustable parameters.

### 3. Fitting Summary

**TABLE S1: Fitting Parameters of the SSP SFG Data from Figure 1.<sup>a</sup>**

| Visible (nm) | $\chi_{NR,ijk}$ | $\xi$ | $A_l$ | error bar |
|--------------|-----------------|-------|-------|-----------|
| 420          | 0.301           | 107   | 8.92  | 1.338     |
| 425          | 0.360           | 102   | 9.11  | 1.367     |
| 435          | 0.688           | 105   | 10.86 | 1.629     |
| 440          | 0.474           | 101   | 10.19 | 1.529     |
| 450          | 0.498           | 99    | 8.02  | 1.203     |
| 470          | 0.248           | 92    | 6.02  | 0.903     |
| 490          | 0.122           | 81    | 4.05  | 0.608     |
| 500          | 0.197           | 72    | 2.74  | 0.411     |
| 510          | 0.160           | 60    | 2.62  | 0.393     |
| 520          | 0.142           | 62    | 1.88  | 0.282     |
| 532          | 0.111           | 66    | 1.59  | 0.239     |
| 550          | 0.180           | 66    | 0.78  | 0.117     |
| 570          | 0.128           | 56    | 0.53  | 0.080     |

<sup>a</sup> Peak position  $\omega_l$  and the width  $\Gamma_l$  are fixed with  $1610\text{ cm}^{-1}$  and  $8\text{ cm}^{-1}$ , respectively.

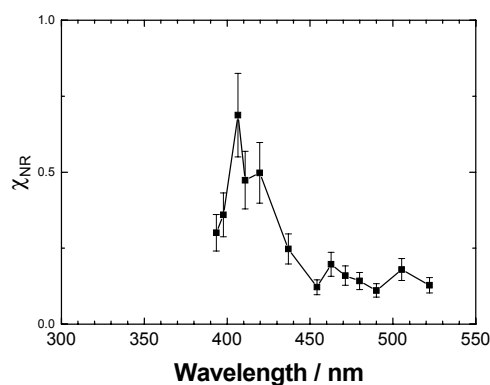

Figure S2 The changes in the  $\chi_{NR}$  deduced from the fitting of the two-color SFG spectra in Fig. 1.

**TABLE S2: Fitting Parameters of the SSP SFG Data from Figure 2.<sup>b</sup>**

| Visible (nm) | $\chi_{NR,ijk}$ | $\xi$ | $A_l$ | error bar |
|--------------|-----------------|-------|-------|-----------|
| 420          | 0.466           | 10    | 1.90  | 0.38      |
| 435          | 0.664           | 13    | 3.40  | 0.67      |
| 440          | 0.560           | 16    | 4.06  | 0.83      |
| 450          | 0.624           | 15    | 4.60  | 0.67      |
| 470          | 0.490           | 16    | 2.95  | 0.65      |
| 490          | 0.273           | 10    | 1.91  | 0.38      |
| 510          | 0.207           | 5     | 0.80  | 0.11      |
| 532          | 0.126           | -5    | 1.05  | 0.15      |

<sup>b</sup> Peak position  $\omega_l$  and the width  $\Gamma_l$  are fixed with  $1610\text{ cm}^{-1}$  and  $8\text{ cm}^{-1}$ , respectively.

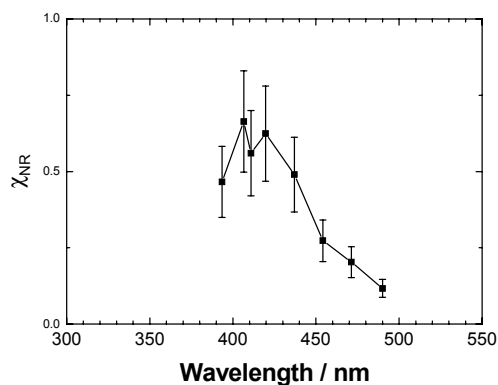

Figure S3 The changes in the  $\chi_{NR}$  deduced from the fitting of the two-color SFG spectra in Fig. 2.

## References

1. T. Miyamae, K. Tsukagoshi, O. Matsuoka, S. Yamamoto, and H. Nozoye, *Langmuir*, 2001, **17**, 8125.
2. T. Miyamae, Y. Miyata, and H. Katura, *J. Phys. Chem. C*, 2009, **113**, 15314.
3. M. B. Raschke, M. Hayashi, S. H. Lin, and Y. R. Shen, *Chem. Phys. Lett.*, 2002, **359**, 367.
4. M. Hayashi, S. H. Lin, M. B. Raschke, and Y. R. Shen, *J. Phys. Chem. A* 2002, **106**, 2271
5. T. Virgili, D. G. Lidzey, D. D. C. Bradley, G. Cerullo, S. Stagira, and S. De Silvestri, *Appl. Phys. Lett.*, 1999, **74**, 2767.
